# Supplementary material for: Structural connectome quantifies tumour invasion and predicts survival in glioblastoma patients
Source: PubMed Central journal article supplement (PMC10115235; doi:10.1093/brain/awac360), 2022-10-03
Supplement: awac360_supplementary_data.pdf [file awac360_supplementary_data.pdf]

# Supplementary Materials and Methods

## 1. Patient inclusion and exclusion criteria

**Inclusion Criteria:** radiological diagnosis of *de novo* glioblastoma; Age 18 - 75; likely to be suitable for radiotherapy with concomitant and adjuvant temozolomide.

**Exclusion Criteria:** unsuitable for a contrast-enhanced MRI; poor image quality; pregnancy or plan for pregnancy; previous history of cranial surgery or cranial radiotherapy/chemotherapy; allergic to aminolaevulinic acid or suffering from porphyria; post-operative non-glioblastoma histology.

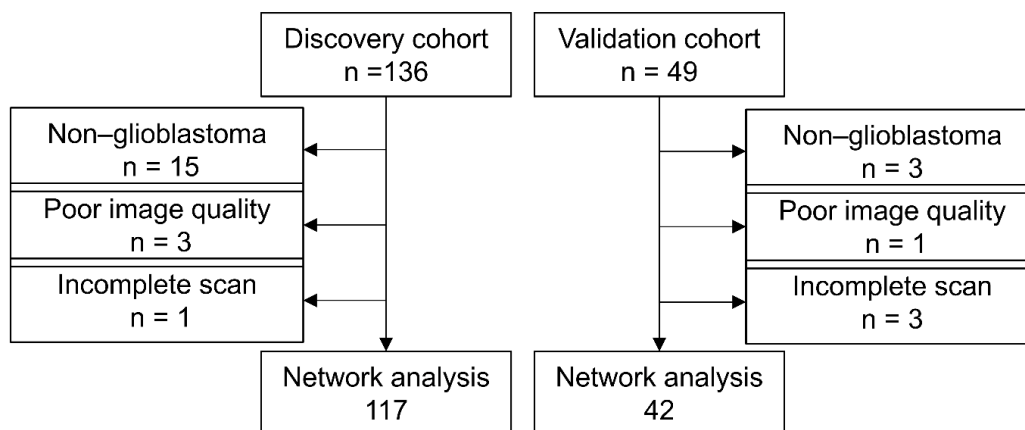

## 2. Scanning protocols of the patient cohorts

|                                                                | Discovery                  | Validation        |
|----------------------------------------------------------------|----------------------------|-------------------|
| <b>T1-weighted imaging</b>                                     |                            |                   |
| Scanner                                                        | Siemens                    | GE                |
| Sequence                                                       | MPRAGE                     | BRAVO             |
| Field Strength (Tesla)                                         | 3                          | 3                 |
| Flip Angle (degree)                                            | 9                          | 12                |
| Resolution X, Y, Z (mm)                                        | 1.0 × 1.0 × 1.0            | 1.0 × 1.0 × 1.0   |
| FOV X × Y (mm)                                                 | 256 × 240                  | 256 × 256         |
| Slice gap (mm)                                                 | 0                          | 0                 |
| TR (ms)                                                        | 2300                       | 8.16              |
| TE (ms)                                                        | 2.98                       | 3.18              |
| Inversion time (ms)                                            | 900                        | 450               |
| <b>T2-weighted imaging</b>                                     |                            |                   |
| Flip Angle (degree)                                            | 150                        | 111               |
| Resolution X, Y, Z (mm)                                        | 0.69 × 0.69 × 5            | 0.23 × 0.23 × 6   |
| FOV X, Y (mm)                                                  | 220 × 165                  | 240 × 240         |
| Slice gap (mm)                                                 | 0.5                        | 1                 |
| TR (ms)                                                        | 4840                       | 4942              |
| TE (ms)                                                        | 114                        | 87.6              |
| <b>T2-weighted fluid-attenuated inversion recovery (FLAIR)</b> |                            |                   |
| Flip Angle (degree)                                            | 150                        | 111               |
| Resolution X, Y, Z (mm)                                        | 0.78 × 0.78 × 4.0          | 0.47 × 0.47 × 6.0 |
| FOV X, Y (mm)                                                  | 250 × 200                  | 240 × 240         |
| Slice gap (mm)                                                 | 1                          | 0                 |
| TR (ms)                                                        | 7840                       | 8000              |
| TE (ms)                                                        | 95                         | 124.6             |
| Inversion time (ms)                                            | 2500                       | 2129              |
| <b>Diffusion-weighted imaging</b>                              |                            |                   |
| Flip Angle (degree)                                            | 90                         | 90                |
| Resolution X, Y, Z (mm)                                        | 2.0 × 2.0 × 2.0            | 0.93 × 0.93 × 3.0 |
| FOV X, Y (mm)                                                  | 192 × 192                  | 256 × 128         |
| Slice gap (mm)                                                 | 0                          | 3                 |
| TR (ms)                                                        | 8300                       | 8000              |
| TE (ms)                                                        | 98                         | 87.4              |
| B value                                                        | 350, 650, 1000, 1300, 1600 | 1000              |
| Gradient direction                                             | 12 for each b value        | 64                |

### 3. Demographics and imaging details of the ADNI healthy controls

The healthy controls used to generate the template of white matter connections were obtained from the Alzheimer’s Disease Neuroimaging Initiative (ADNI) database ([adni.loni.usc.edu](http://adni.loni.usc.edu)). Ten elderly healthy subjects were selected from the ADNI-CN (healthy control) research group (mean age  $60.9 \pm 1.5$  years, median age 60.2 years, range 58.4 - 62.1 years, three males). No significant age difference was found between the control and Discovery cohorts (Two-sample t-test  $P = 0.712$ ). The diffusion MRI protocol of the healthy controls is as below.

|                         |              |
|-------------------------|--------------|
| Scanner                 | SIEMENS      |
| Field Strength (Tesla)  | 3            |
| Flip Angle (degree)     | 90           |
| Resolution X, Y, Z (mm) | 2,2,2        |
| FOV X, Y, Z(mm)         | 115, 115, 80 |
| Pulse Sequence          | EP           |
| TR (ms)                 | 7200         |
| TE (ms)                 | 56           |
| B value                 | 1000         |
| Gradient direction      | 54           |

#### 4. Demographics and imaging details of IXI healthy subject dataset

The age-matched healthy controls used for generating control brain networks were obtained from the IXI dataset (<https://brain-development.org/ixi-dataset/>). The IXI dataset includes T1, T2, PD, dMRI, and MRA data for some or all of 619 healthy subjects.

For the present study, 117 age-matched healthy controls (mean age  $59.9 \pm 10.1$  years, median age 62.6 years, range 20.9-76.0 years, 63 males) were selected from the IXI dataset. Therefore, each patient in the Discovery cohort was matched with a corresponding healthy control with an age difference  $< 2$  years. No significant age difference was found between the Discovery and healthy control cohorts (two-sample t-test,  $P = 0.605$ ). The dMRI scans of the healthy controls were acquired in two hospitals using two Scanners:

|                         | <b>Hammersmith Hospital</b>    | <b>Guy's Hospital</b>                   |
|-------------------------|--------------------------------|-----------------------------------------|
| Scanner                 | Philips Medical Systems Intera | Philips Medical Systems Gyroscan Intera |
| Field Strength (Tesla)  | 3                              | 1.5                                     |
| Flip Angle (degree)     | 90                             | 90                                      |
| Resolution X, Y, Z (mm) | 1.75, 1.75, 2.00               | 1.75, 1.75, 2.35                        |
| FOV X, Y (mm)           | 112, 110                       | 112, 110                                |
| TR (ms)                 | 11894.4                        | 9054                                    |
| TE (ms)                 | 51                             | 80                                      |
| B value                 | 1000                           | 1000                                    |
| Gradient direction      | 15                             | 15                                      |

## 5. Descriptions of the topological features

| Feature                                                                                                                   | Formula                                                                                                                                                                                                                                                                                                                            | Mathematical meaning                                                                                             | Interpretation                                          |
|---------------------------------------------------------------------------------------------------------------------------|------------------------------------------------------------------------------------------------------------------------------------------------------------------------------------------------------------------------------------------------------------------------------------------------------------------------------------|------------------------------------------------------------------------------------------------------------------|---------------------------------------------------------|
| Clustering coefficient (Cl)                                                                                               | $Cl = \frac{1}{N} \sum_{i \in N} \frac{2t_i}{k_i(k_i - 1)},$ <p>where Cl is the average clustering coefficient in the networks, <math>k_i</math> is the degree/strength of node <math>i</math>, and <math>t_i</math> is the number of closed triangles attached to <math>i</math>. <math>N</math> is the number of nodes (35).</p> | The probability that two nodes directly connected to a third node separately are also linked to each other (35). | A measure of functional segregation or specialization.  |
| Characteristic path length (Lp)                                                                                           | $Lp = \frac{1}{N(N - 1)} \sum_{j \neq i} l_{ij},$ <p>where <math>L</math> is the average shortest path length between nodes in the network, <math>l_{ij}</math> is the shortest path length from node <math>j</math> to node <math>i</math> (35).</p>                                                                              | the average shortest path length between all possible pairs of nodes in a network (35).                          | A measure of global efficiency and network integration. |
| In brain networks, the node refers to brain regions and the edge refers to white matter connections between brain regions |                                                                                                                                                                                                                                                                                                                                    |                                                                                                                  |                                                         |

## 6. Brain regions in the Automatic Anatomical Labelling (AAL) atlas

| Index | Left hemisphere<br>abbr. | Right hemisphere<br>abbr. | Region                                                |
|-------|--------------------------|---------------------------|-------------------------------------------------------|
| 1-2   | PreCG.L                  | PreCG.R                   | Precentral gyrus                                      |
| 3-4   | SFGdor.L                 | SFGdor.R                  | Superior frontal gyrus, dorsolateral                  |
| 5-6   | ORBsup.L                 | ORBsup.R                  | Superior frontal gyrus, orbital part                  |
| 7-8   | MFG.L                    | MFG.R                     | Middle frontal gyrus mfg.l                            |
| 9-10  | ORBmid.L                 | ORBmid.R                  | Middle frontal gyrus, orbital part                    |
| 11-12 | IFGoperc.L               | IFGoperc.R                | Inferior frontal gyrus, opercular part                |
| 13-14 | IFGtriang.L              | IFGtriang.R               | Inferior frontal gyrus, triangular part               |
| 15-16 | ORBinf.L                 | ORBinf.R                  | Inferior frontal gyrus, orbital part                  |
| 17-18 | ROL.L                    | ROL.R                     | Rolandic operculum                                    |
| 19-20 | SMA.L                    | SMA.R                     | Supplementary motor area                              |
| 21-22 | OLF.L                    | OLF.R                     | Olfactory cortex                                      |
| 23-24 | SFGmed.L                 | SFGmed.R                  | Superior frontal gyrus, medial                        |
| 25-26 | ORBsupmed.L              | ORBsupmed.R               | Superior frontal gyrus, medial orbital                |
| 27-28 | REC.L                    | REC.R                     | Gyrus rectus                                          |
| 29-30 | INS.L                    | INS.R                     | Insula                                                |
| 31-32 | ACG.L                    | ACG.R                     | Anterior cingulate and paracingulate gyri             |
| 33-34 | DCG.L                    | DCG.R                     | Median cingulate and paracingulate gyri               |
| 35-36 | PCG.L                    | PCG.R                     | Posterior cingulate gyrus                             |
| 37-38 | HIP.L                    | HIP.R                     | Hippocampus                                           |
| 39-40 | PHG.L                    | PHG.R                     | Parahippocampal gyrus                                 |
| 41-42 | AMYG.L                   | AMYG.R                    | Amygdala                                              |
| 43-44 | CAL.L                    | CAL.R                     | Calcarine fissure and surrounding cortex              |
| 45-46 | CUN.L                    | CUN.R                     | Cuneus                                                |
| 47-48 | LING.L                   | LING.R                    | Lingual gyrus                                         |
| 49-50 | SOG.L                    | SOG.R                     | Superior occipital gyrus                              |
| 51-52 | MOG.L                    | MOG.R                     | Middle occipital gyrus                                |
| 53-54 | IOG.L                    | IOG.R                     | Inferior occipital gyrus                              |
| 55-56 | FFG.L                    | FFG.R                     | Fusiform gyrus                                        |
| 57-58 | PoCG.L                   | PoCG.R                    | Postcentral gyrus                                     |
| 59-60 | SPG.L                    | SPG.R                     | Superior parietal gyrus                               |
| 61-62 | IPL.L                    | IPL.R                     | Inferior parietal, but supramarginal and angular gyri |
| 63-64 | SMG.L                    | SMG.R                     | Supramarginal gyrus                                   |
| 65-66 | ANG.L                    | ANG.R                     | Angular gyrus                                         |
| 67-68 | PCUN.L                   | PCUN.R                    | Precuneus                                             |
| 69-70 | PCL.L                    | PCL.R                     | Paracentral lobule                                    |
| 71-72 | CAU.L                    | CAU.R                     | Caudate nucleus                                       |
| 73-74 | PUT.L                    | PUT.R                     | Lenticular nucleus, putamen                           |
| 75-76 | PAL.L                    | PAL.R                     | Lenticular nucleus, pallidum                          |

|                   |          |          |                                        |
|-------------------|----------|----------|----------------------------------------|
| 77-78             | THA.L    | THA.R    | Thalamus                               |
| 79-80             | HES.L    | HES.R    | Heschl gyrus                           |
| 81-82             | STG.L    | STG.R    | Superior temporal gyrus                |
| 83-84             | TPOsup.L | TPOsup.R | Temporal pole: superior temporal gyrus |
| 85-86             | MTG.L    | MTG.R    | Middle temporal gyrus                  |
| 87-88             | TPOmid.L | TPOmid.R | Temporal pole: middle temporal gyrus   |
| 89-90             | ITG.L    | ITG.R    | Inferior temporal gyrus                |
| R: right; L: left |          |          |                                        |

## 7. Anatomical tracts in the XTRACT atlas

| Abbreviation              |        | Tract                                |
|---------------------------|--------|--------------------------------------|
| <b>Association Fibres</b> |        |                                      |
| af.l                      | af.r   | Arcuate fasciculus                   |
| fa.l                      | fa.r   | Frontal aslant                       |
| ilf.l                     | ilf.r  | Inferior longitudinal fasciculus     |
| ifo.l                     | ifo.r  | Inferior fronto-occipital fasciculus |
| mdlf.l                    | mdlf.r | Middle longitudinal fasciculus       |
| slf1.l                    | slf1.r | Superior longitudinal fasciculus 1   |
| slf2.l                    | slf2.r | Superior longitudinal fasciculus 2   |
| slf3.l                    | slf3.r | Superior longitudinal fasciculus 3   |
| uf.l                      | uf.r   | Uncinate fasciculus                  |
| vof.l                     | vof.r  | Vertical occipital fasciculus        |
| <b>Commissural Fibres</b> |        |                                      |
|                           | ac     | Anterior commissure                  |
|                           | fma    | Forceps major                        |
|                           | fmi    | Forceps minor                        |
|                           | mcp    | Middle cerebellar peduncle           |
| <b>Limbic Fibres</b>      |        |                                      |
| cbd.l                     | cbd.r  | Cingulum subsection: Dorsal          |
| cbp.l                     | cbp.r  | Cingulum subsection: Peri-genua      |
| cbt.l                     | cbt.r  | Cingulum subsection: Temporal        |
| fx.l                      | fx.r   | Fornix                               |
| <b>Projection Fibres</b>  |        |                                      |
| ar.l                      | ar.r   | Acoustic radiation                   |
| atr.l                     | atr.r  | Anterior thalamic radiation          |
| cst.l                     | cst.r  | Corticospinal tract                  |
| or.l                      | or.r   | Optic radiation                      |
| str.l                     | str.r  | Superior thalamic radiation          |
| r: right; l: left         |        |                                      |



## Supplementary Results

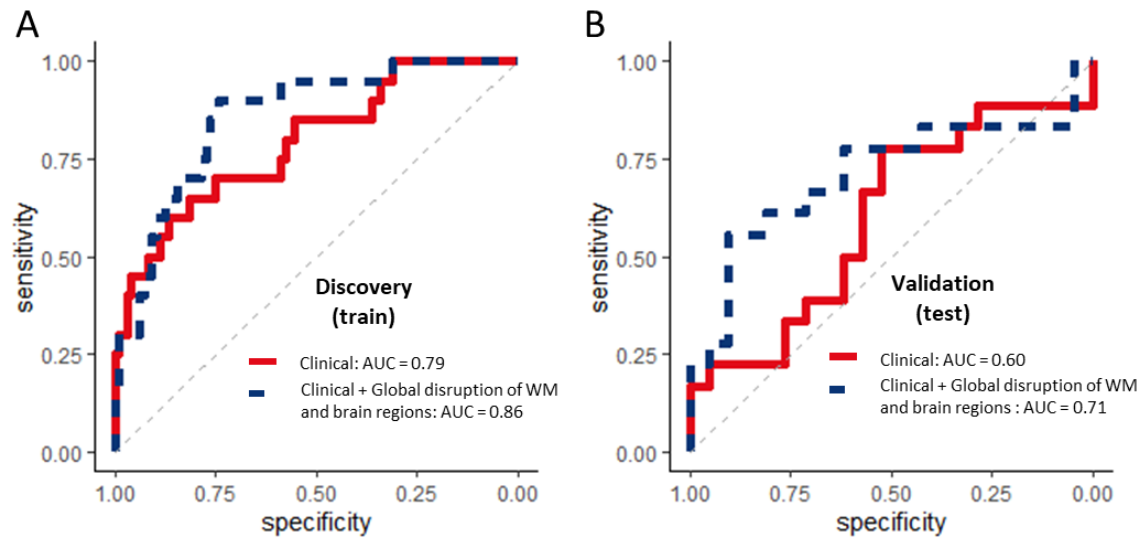

**Fig. S1. Predicting KPS cut-off with a logistic model. (A)** The logistic models trained on clinical data and clinical data (Age, tumor volume) with global disruption showed a slight increase in the AUC from 0.79 to 0.86 for the Discovery cohort. **(B)** The out-of-sample prediction on the Validation cohort showed a larger increase in the AUC from 0.60 to 0.71.

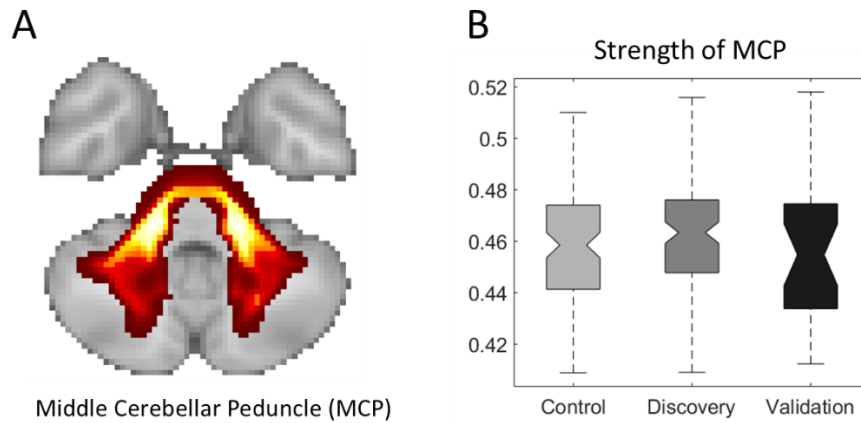

**Fig. S2. White matter connection strengths of the middle cerebellar peduncle across three cohorts.**

**(A)** The middle cerebellar peduncle (MCP) is expected unaffected by the supratentorial tumour in the two study cohorts. **(B)** Patient and control cohorts show no significant difference in the MCP connection strength (Two-sample T test  $P$  value: Control vs Discovery = 0.063, Control vs Validation = 0.370; Two-sample F test  $P$  value: Control vs Discovery = 0.648, Control vs Validation = 0.757).

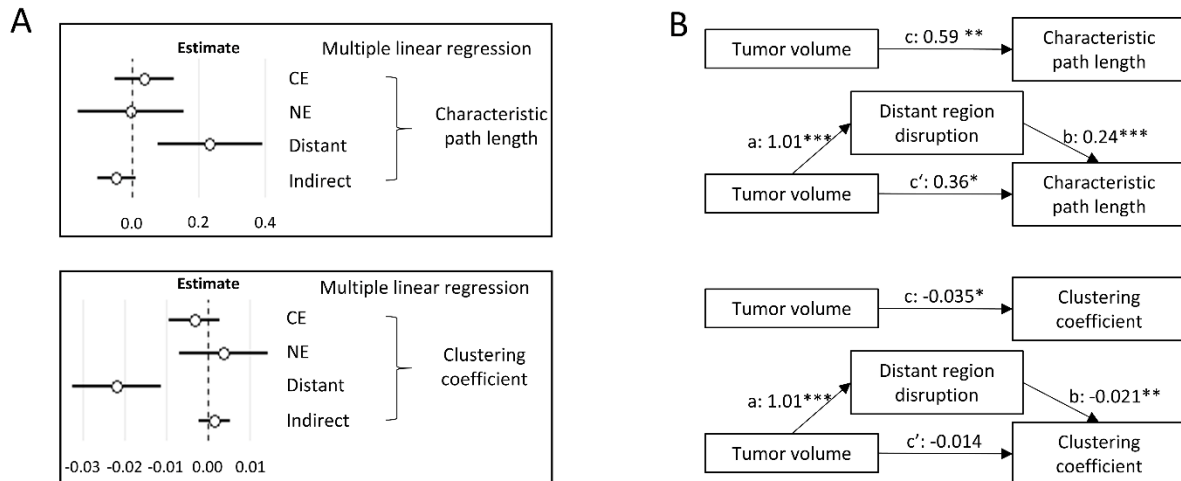

**Fig. S3. Topological alteration of the structural connectome of the Validation cohort. (A)** The disruption of the Distant regions is the only significant predictor for characteristic path length (estimate = 0.23,  $P = 0.005$ ) (**upper**) and clustering coefficient (estimate = -0.022,  $P < 0.001$ ) (**lower**) in multiple linear regression models. **(B)** The effects of tumour volume on characteristic path length are mediated by the disruption of the Distant regions (**upper**): total effect (c path) = 0.59,  $P = 0.008$ ; direct effect (c' path) = 0.36,  $P = 0.01$ ; mediation effect (c - c') = 0.23,  $P < 0.001$  (mediated by the disruption of the Distant regions). The effects of tumour volume on clustering coefficient are mediated by the disruption of the Distant regions (**lower**): total effect (c path) = -0.035,  $P < 0.001$ ; direct effect (c' path) = -0.014,  $P = 0.367$ ; mediation effect (c - c') = -0.021,  $P = 0.005$  (mediated by the disruption of Distant regions).  $P$  values significant codes:  $P < 0.001$  \*\*\*,  $P < 0.01$  \*\*,  $P < 0.05$  \*.

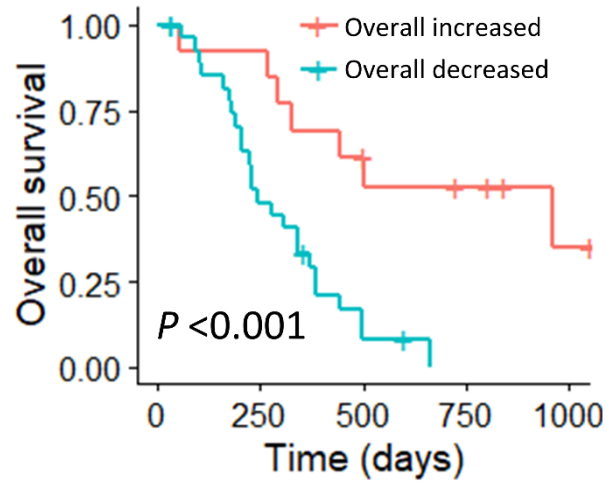

**Fig. S4. Patient stratification in the Validation cohort using the preserved connectivity of Distant regions.** Patients with overall increased strength (10/42, 23.8%) show better overall survival than the patients with decreased strength (32/42, 76.2%). Log-rank test:  $P < 0.001$ .

**Table S1. Summary of the patient cohorts**

| Variable                                                         | Patient Number |             | P value |
|------------------------------------------------------------------|----------------|-------------|---------|
|                                                                  | Discovery      | Validation  |         |
| <b>Age at diagnosis</b>                                          |                |             |         |
| <60                                                              | 42             | 18          | 0.425   |
| ≥60                                                              | 75             | 24          |         |
| <b>Sex</b>                                                       |                |             |         |
| Male                                                             | 89             | 30          | 0.236   |
| Female                                                           | 28             | 12          |         |
| <b>Extent of resection (of enhancing tumour)</b>                 |                |             |         |
| Complete                                                         | 77             | 32          | 0.572   |
| Partial                                                          | 32             | 6           |         |
| Biopsy                                                           | 8              | 4           |         |
| <b>MGMT-methylation status <sup>a</sup></b>                      |                |             |         |
| Methylated                                                       | 49             | 21          | 0.363   |
| Unmethylated                                                     | 68             | 21          |         |
| <b>IDH-1 mutation status</b>                                     |                |             |         |
| Mutant                                                           | 7              | 1           | 0.360   |
| Wild type                                                        | 110            | 41          |         |
| <b>Pre-operative Tumour volumes(cm<sup>3</sup>) <sup>b</sup></b> |                |             |         |
| Contrast-enhancing                                               | 44.7 ± 28.8    | 45.2 ± 29.4 | 0.841   |
| Non-enhancing                                                    | 50.3 ± 36.2    | 46.4 ± 32.6 | 0.652   |

(a): MGMT-methylation status unavailable for 4 patients in Discovery cohort; (b): mean ± SD of original data. MGMT: O-6-methylguanine-DNA methyltransferase; IDH-1: Isocitrate dehydrogenase 1.

**Table S2. Comparison of the two patient cohorts**

| Category                                  | Discovery   |           | Validation  |           | <i>P</i> value |
|-------------------------------------------|-------------|-----------|-------------|-----------|----------------|
|                                           | Mean ± SD   | 95%CI     | Mean ± SD   | 95%CI     |                |
| <b>White matter connection disruption</b> |             |           |             |           |                |
| Direct                                    | 4.77 ± 1.56 | 2.60-7.43 | 4.95 ± 1.50 | 2.92-8.00 | 0.518          |
| Indirect                                  | 2.59 ± 0.39 | 2.51-2.67 | 2.54 ± 0.53 | 2.43-2.65 | 0.520          |
| <b>Brain region disruption</b>            |             |           |             |           |                |
| CE                                        | 5.83 ± 2.00 | 2.80-8.74 | 5.51 ± 1.80 | 2.28-7.45 | 0.363          |
| NE                                        | 4.67 ± 1.33 | 2.77-7.43 | 4.54 ± 1.53 | 2.30-7.45 | 0.603          |
| Distant                                   | 2.90 ± 0.71 | 2.30-3.83 | 3.08 ± 0.76 | 2.33-4.33 | 0.169          |
| Indirect                                  | 2.56 ± 0.39 | 2.15-3.37 | 2.62 ± 0.55 | 2.17-4.05 | 0.447          |

**Table S3. Comparison of regional disruption indices**

| <b>White matter connection disruption</b> |           |                        |                       |                        |           |                        |                       |                        |
|-------------------------------------------|-----------|------------------------|-----------------------|------------------------|-----------|------------------------|-----------------------|------------------------|
| Category                                  | Mean ± SD | <b>Discovery</b>       |                       |                        | Mean ± SD | <b>Validation</b>      |                       |                        |
|                                           |           | <i>P</i> (vs Indirect) |                       |                        |           | <i>P</i> (vs Indirect) |                       |                        |
| Direct                                    | 4.77±1.56 | <0.001                 |                       |                        | 4.95±1.50 | <0.001                 |                       |                        |
| Indirect                                  | 2.59±0.39 | -                      |                       |                        | 2.54±0.53 | -                      |                       |                        |
| <b>Brain region disruption</b>            |           |                        |                       |                        |           |                        |                       |                        |
| Category                                  | Mean ± SD | <b>Discovery</b>       |                       |                        | Mean ± SD | <b>Validation</b>      |                       |                        |
|                                           |           | <i>P</i> (vs NE)       | <i>P</i> (vs Distant) | <i>P</i> (vs Indirect) |           | <i>P</i> (vs NE)       | <i>P</i> (vs Distant) | <i>P</i> (vs Indirect) |
| CE                                        | 5.83±2.00 | <0.001                 | <0.001                | <0.001                 | 5.51±1.80 | 0.018                  | <0.001                | <0.001                 |
| NE                                        | 4.67±1.33 | -                      | <0.001                | <0.001                 | 4.54±1.53 | -                      | <0.001                | <0.001                 |
| Distant                                   | 2.90±0.71 | -                      | -                     | <0.001                 | 3.08±0.76 | -                      | -                     | 0.018                  |
| Indirect                                  | 2.56±0.39 | -                      | -                     | -                      | 2.62±0.55 | -                      | -                     | -                      |
| <i>P</i> value adjusted by FDR            |           |                        |                       |                        |           |                        |                       |                        |

**Table S4. Pearson correlations of disruption indices**

| <b>White matter connection disruption</b> |                   |                   |                   |                   |                   |                   |
|-------------------------------------------|-------------------|-------------------|-------------------|-------------------|-------------------|-------------------|
|                                           | Discovery         |                   |                   | Validation        |                   |                   |
| Category                                  | r ( <i>P</i> )    |                   |                   | r ( <i>P</i> )    |                   |                   |
|                                           | Indirect          |                   |                   | Indirect          |                   |                   |
| Direct                                    | 0.44 (<0.001)     |                   |                   | 0.51 (<0.001)     |                   |                   |
| <b>Brain region disruption</b>            |                   |                   |                   |                   |                   |                   |
|                                           | Discovery         |                   |                   | Validation        |                   |                   |
| Category                                  | r<br>( <i>P</i> ) | r<br>( <i>P</i> ) | r<br>( <i>P</i> ) | r<br>( <i>P</i> ) | r<br>( <i>P</i> ) | r<br>( <i>P</i> ) |
|                                           | NE                | Distant           | Indirect          | NE                | Distant           | Indirect          |
| CE                                        | 0.41<br>(<0.001)  | 0.43<br>(<0.001)  | 0.21<br>(0.156)   | 0.63<br>(<0.001)  | 0.54<br>(0.002)   | 0.39<br>(0.094)   |
| NE                                        | -                 | 0.34<br>(0.028)   | 0.26<br>(0.056)   | -                 | 0.54<br>(0.002)   | 0.42<br>(0.056)   |
| Distant                                   | -                 | -                 | 0.11<br>(0.237)   | -                 | -                 | 0.22<br>(0.176)   |

*P* value adjusted by FDR



**Table S5. Pearson correlations between connectome disruption and tumour volume**

|                                | Discovery        |                 | Validation       |                 |
|--------------------------------|------------------|-----------------|------------------|-----------------|
|                                | <b>Pearson r</b> | <b><i>P</i></b> | <b>Pearson r</b> | <b><i>P</i></b> |
| Direct connections             | 0.52             | <0.001          | 0.72             | <0.001          |
| Indirect connections           | 0.07             | 0.453           | 0.09             | 0.563           |
| CE regions                     | 0.48             | <0.001          | 0.62             | <0.001          |
| NE regions                     | 0.20             | 0.041           | 0.52             | 0.002           |
| Distant regions                | 0.33             | <0.001          | 0.39             | 0.013           |
| Indirect regions               | -0.06            | 0.489           | 0.19             | 0.234           |
| <i>P</i> value adjusted by FDR |                  |                 |                  |                 |

**Table S6. Proportions of the disrupted connectome**

| <b>White matter connection disruptions</b> |              |                            |                           |                            |              |                            |                           |                            |
|--------------------------------------------|--------------|----------------------------|---------------------------|----------------------------|--------------|----------------------------|---------------------------|----------------------------|
| Category                                   | Mean ± SD    | Discovery                  |                           |                            | Validation   |                            |                           |                            |
|                                            |              | <i>P</i><br>(vs. Indirect) |                           |                            | Mean ± SD    | <i>P</i><br>(vs. Indirect) |                           |                            |
| Direct                                     | 20.4 ± 9.6%  | <0.001                     |                           |                            | 20.7 ± 10.1% | <0.001                     |                           |                            |
| Indirect                                   | 11.5 ± 6.7%  | -                          |                           |                            | 13.2 ± 6.6%  | -                          |                           |                            |
| <b>Brain region disruptions</b>            |              |                            |                           |                            |              |                            |                           |                            |
| Category                                   | Mean ± SD    | Discovery                  |                           |                            | Mean ± SD    | Validation                 |                           |                            |
|                                            |              | <i>P</i><br>(vs. NE)       | <i>P</i><br>(vs. Distant) | <i>P</i><br>(vs. Indirect) |              | <i>P</i><br>(vs. NE)       | <i>P</i><br>(vs. Distant) | <i>P</i><br>(vs. Indirect) |
| CE                                         | 5.8 ± 5.1%   | <0.001                     | <0.001                    | <0.001                     | 5.9 ± 4.0%   | 0.341                      | <0.001                    | <0.001                     |
| NE                                         | 11.3 ± 7.2%  | -                          | <0.001                    | <0.001                     | 8.6 ± 7.9%   | -                          | 0.007                     | <0.001                     |
| Distant                                    | 16.8 ± 12.0% | -                          | -                         | <0.001                     | 16.3 ± 9.9%  | -                          | -                         | <0.001                     |
| Indirect                                   | 3.2 ± 3.0%   | -                          | -                         | -                          | 2.1% ± 2.3%  | -                          | -                         | -                          |
| <i>P</i> value adjusted by FDR             |              |                            |                           |                            |              |                            |                           |                            |

**Table S7. Disruption probabilities of the XTRACT tracts**

| Index | Tracts | Disruption probability |
|-------|--------|------------------------|
| 1     | ac     | 0.20                   |
| 2     | af.l   | 0.32                   |
| 3     | af.r   | 0.40                   |
| 4     | ar.l   | 0.23                   |
| 5     | ar.r   | 0.27                   |
| 6     | atr.l  | 0.27                   |
| 7     | atr.r  | 0.23                   |
| 8     | cbd.l  | 0.28                   |
| 9     | cbd.r  | 0.23                   |
| 10    | cbp.l  | 0.20                   |
| 11    | cbp.r  | 0.20                   |
| 12    | cbt.l  | 0.24                   |
| 13    | cbt.r  | 0.21                   |
| 14    | cst.l  | 0.25                   |
| 15    | cst.r  | 0.18                   |
| 16    | fa.l   | 0.29                   |
| 17    | fa.r   | 0.26                   |
| 18    | fma    | -                      |
| 19    | fmi    | 0.27                   |
| 20    | fx.l   | -                      |
| 21    | fx.r   | -                      |
| 22    | ifo.l  | 0.28                   |
| 23    | ifo.r  | 0.30                   |
| 24    | ilf.l  | -                      |
| 25    | ilf.r  | -                      |
| 26    | mcp    | -                      |
| 27    | mdlf.l | 0.27                   |
| 28    | mdlf.r | 0.38                   |
| 29    | or.l   | 0.23                   |
| 30    | or.r   | 0.29                   |
| 31    | slf1.l | 0.30                   |
| 32    | slf1.r | -                      |
| 33    | slf2.l | 0.30                   |
| 34    | slf2.r | -                      |
| 35    | slf3.l | 0.32                   |
| 36    | slf3.r | -                      |
| 37    | str.l  | 0.22                   |
| 38    | str.r  | 0.17                   |
| 39    | uf.l   | 0.29                   |
| 40    | uf.r   | 0.29                   |
| 41    | vof.l  | -                      |

---

*P* value adjusted by FDR. ‘-’ denotes the tracts that are not significantly disrupted.

**Table S8. Probabilities of CE, NE and Distant region disruption**

| Inde<br>x | CE              |          |       | NE              |          |       | Distant         |          |       |
|-----------|-----------------|----------|-------|-----------------|----------|-------|-----------------|----------|-------|
|           | Mean $\pm$ SD   | <i>P</i> | Prob. | Mean $\pm$ SD   | <i>P</i> | Prob. | Mean $\pm$ SD   | <i>P</i> | Prob. |
| 1         | 0.49 $\pm$ 0.38 | 0.001    | 0.11  | 0.49 $\pm$ 0.38 | <0.001   | 0.14  | 0.46 $\pm$ 0.09 | <0.001   | 0.15  |
| 2         | 0.53 $\pm$ 0.47 | 0.005    | 0.08  | 0.53 $\pm$ 0.47 | 0.001    | 0.10  | 0.59 $\pm$ 0.23 | 0.026    | 0.03  |
| 3         | 0.38 $\pm$ 0.23 | 0.003    | 0.08  | 0.38 $\pm$ 0.23 | <0.001   | 0.14  | 0.43 $\pm$ 0.38 | <0.001   | 0.18  |
| 4         | 0.66 $\pm$ 0.78 | 0.003    | 0.09  | 0.66 $\pm$ 0.78 | 0.001    | 0.11  | 0.51 $\pm$ 0.20 | 0.003    | 0.08  |
| 5         | 0.41 $\pm$ 0.24 | 0.017    | 0.05  | 0.41 $\pm$ 0.24 | <0.001   | 0.15  | 0.23 $\pm$ 0.61 | <0.001   | 0.13  |
| 6         | 0.74 $\pm$ 0.70 | 0.031    | 0.03  | 0.74 $\pm$ 0.70 | 0.011    | 0.05  | 0.42 $\pm$ 0.24 | <0.001   | 0.14  |
| 7         | 0.81 $\pm$ 0.75 | 0.002    | 0.09  | 0.81 $\pm$ 0.75 | <0.001   | 0.14  | 0.56 $\pm$ 0.48 | <0.001   | 0.14  |
| 8         | 0.49 $\pm$ 0.44 | <0.001   | 0.13  | 0.49 $\pm$ 0.44 | 0.001    | 0.10  | 0.53 $\pm$ 0.78 | 0.002    | 0.08  |
| 9         | 0.79 $\pm$ 1.11 | 0.014    | 0.05  | 0.79 $\pm$ 1.11 | 0.004    | 0.08  | 0.63 $\pm$ 0.17 | 0.006    | 0.06  |
| 10        | 0.28 $\pm$ 0.19 | 0.029    | 0.03  | 0.28 $\pm$ 0.19 | 0.004    | 0.07  | 0.35 $\pm$ 0.08 | <0.001   | 0.21  |
| 11        | 0.18 $\pm$ 0.24 | 0.003    | 0.09  | 0.18 $\pm$ 0.24 | <0.001   | 0.14  | 0.32 $\pm$ 0.63 | <0.001   | 0.14  |
| 12        | 0.68 $\pm$ 0.41 | 0.001    | 0.10  | 0.68 $\pm$ 0.41 | 0.001    | 0.11  | 0.47 $\pm$ 0.21 | 0.005    | 0.08  |
| 13        | 0.32 $\pm$ 0.21 | 0.002    | 0.09  | 0.32 $\pm$ 0.21 | <0.001   | 0.14  | 0.18 $\pm$ 0.04 | <0.001   | 0.16  |
| 14        | 0.18 $\pm$ 0.17 | 0.001    | 0.10  | 0.18 $\pm$ 0.17 | 0.001    | 0.10  | 0.27 $\pm$ 0.73 | <0.001   | 0.15  |
| 15        | 1.49 $\pm$ 1.64 | 0.009    | 0.06  | 1.49 $\pm$ 1.64 | <0.001   | 0.19  | 0.80 $\pm$ 0.36 | <0.001   | 0.16  |
| 16        | 0.51 $\pm$ 0.72 | 0.010    | 0.06  | 0.51 $\pm$ 0.72 | 0.001    | 0.12  | 0.30 $\pm$ 0.30 | <0.001   | 0.24  |
| 17        | 0.47 $\pm$ 0.32 | 0.001    | 0.11  | 0.47 $\pm$ 0.32 | <0.001   | 0.21  | 0.43 $\pm$ 0.11 | <0.001   | 0.22  |
| 18        | 0.24 $\pm$ 0.21 | <0.001   | 0.19  | 0.24 $\pm$ 0.21 | <0.001   | 0.25  | 1.42 $\pm$ 1.24 | 0.005    | 0.06  |
| 19        | 0.64 $\pm$ 1.28 | 0.018    | 0.05  | 0.64 $\pm$ 1.28 | 0.005    | 0.07  | 1.00 $\pm$ 0.61 | <0.001   | 0.12  |
| 20        | 0.39 $\pm$ 0.62 | 0.054    | -     | 0.39 $\pm$ 0.62 | 0.021    | 0.04  | 0.79 $\pm$ 0.84 | 0.048    | 0.03  |
| 21        | 0.47 $\pm$ 0.47 | 0.031    | 0.03  | 0.47 $\pm$ 0.47 | 0.001    | 0.09  | 0.67 $\pm$ 1.03 | <0.001   | 0.12  |
| 22        | 0.23 $\pm$ 1.05 | 0.007    | 0.06  | 0.23 $\pm$ 1.05 | <0.001   | 0.15  | 0.90 $\pm$ 0.56 | <0.001   | 0.22  |
| 23        | 0.39 $\pm$ 0.94 | 0.005    | 0.09  | 0.39 $\pm$ 0.94 | 0.001    | 0.12  | 0.68 $\pm$ 0.40 | <0.001   | 0.16  |
| 24        | 0.24 $\pm$ 0.72 | 0.008    | 0.06  | 0.24 $\pm$ 0.72 | 0.001    | 0.10  | 1.06 $\pm$ 0.82 | 0.001    | 0.09  |
| 25        | 0.36 $\pm$ 0.86 | 0.024    | 0.04  | 0.36 $\pm$ 0.86 | 0.002    | 0.10  | 0.86 $\pm$ 0.49 | 0.003    | 0.07  |
| 26        | 0.51 $\pm$ 0.76 | 0.032    | 0.03  | 0.51 $\pm$ 0.76 | 0.004    | 0.08  | 0.68 $\pm$ 0.31 | 0.079    | -     |
| 27        | 0.16 $\pm$ 0.55 | 0.029    | 0.03  | 0.16 $\pm$ 0.55 | 0.002    | 0.08  | 0.67 $\pm$ 0.81 | 0.001    | 0.09  |
| 28        | 0.68 $\pm$ 1.32 | 0.021    | 0.04  | 0.68 $\pm$ 1.32 | 0.006    | 0.06  | 0.98 $\pm$ 0.88 | <0.001   | 0.23  |
| 29        | 0.50 $\pm$ 0.40 | <0.001   | 0.21  | 0.50 $\pm$ 0.40 | <0.001   | 0.35  | 0.17 $\pm$ 0.04 | <0.001   | 0.24  |
| 30        | 0.53 $\pm$ 0.60 | <0.001   | 0.30  | 0.53 $\pm$ 0.60 | <0.001   | 0.43  | 0.69 $\pm$ 0.58 | <0.001   | 0.12  |
| 31        | 0.59 $\pm$ 0.89 | 0.004    | 0.08  | 0.59 $\pm$ 0.89 | <0.001   | 0.15  | 0.19 $\pm$ 0.13 | 0.002    | 0.09  |
| 32        | 0.49 $\pm$ 1.30 | 0.001    | 0.11  | 0.49 $\pm$ 1.30 | <0.001   | 0.16  | 0.31 $\pm$ 0.15 | 0.001    | 0.10  |
| 33        | 0.51 $\pm$ 1.04 | 0.001    | 0.11  | 0.51 $\pm$ 1.04 | <0.001   | 0.18  | 0.23 $\pm$ 0.18 | <0.001   | 0.14  |
| 34        | 0.57 $\pm$ 0.87 | 0.003    | 0.08  | 0.57 $\pm$ 0.87 | 0.001    | 0.10  | 0.83 $\pm$ 0.41 | 0.014    | 0.04  |
| 35        | 0.13 $\pm$ 0.08 | 0.016    | 0.04  | 0.13 $\pm$ 0.08 | 0.006    | 0.06  | 0.15 $\pm$ 0.14 | <0.001   | 0.46  |
| 36        | 0.51 $\pm$ 0.45 | 0.016    | 0.04  | 0.51 $\pm$ 0.45 | 0.001    | 0.09  | 0.92 $\pm$ 0.40 | <0.001   | 0.35  |
| 37        | 0.79 $\pm$ 1.00 | <0.001   | 0.14  | 0.79 $\pm$ 1.00 | <0.001   | 0.21  | 0.93 $\pm$ 0.71 | <0.001   | 0.32  |
| 38        | 0.02 $\pm$ 0.31 | <0.001   | 0.23  | 0.02 $\pm$ 0.31 | <0.001   | 0.29  | 0.61 $\pm$ 0.79 | <0.001   | 0.21  |
| 39        | 0.05 $\pm$ 0.27 | 0.001    | 0.11  | 0.05 $\pm$ 0.27 | <0.001   | 0.18  | 0.85 $\pm$ 0.62 | <0.001   | 0.27  |

|    |             |        |      |             |        |      |             |        |      |
|----|-------------|--------|------|-------------|--------|------|-------------|--------|------|
| 40 | 0.59 ± 1.84 | <0.001 | 0.15 | 0.59 ± 1.84 | <0.001 | 0.15 | 0.09 ± 0.36 | <0.001 | 0.26 |
| 41 | 1.15 ± 2.12 | 0.002  | 0.09 | 1.15 ± 2.12 | <0.001 | 0.14 | 0.28 ± 0.21 | <0.001 | 0.22 |
| 42 | 1.29 ± 1.01 | 0.003  | 0.09 | 1.29 ± 1.01 | <0.001 | 0.14 | 0.79 ± 1.14 | <0.001 | 0.25 |
| 43 | 1.62 ± 1.74 | 0.016  | 0.04 | 1.62 ± 1.74 | 0.002  | 0.08 | 0.46 ± 0.33 | <0.001 | 0.29 |
| 44 | 0.91 ± 0.84 | <0.001 | 0.18 | 0.91 ± 0.84 | <0.001 | 0.26 | 0.65 ± 1.18 | <0.001 | 0.17 |
| 45 | 1.09 ± 1.25 | 0.002  | 0.09 | 1.09 ± 1.25 | <0.001 | 0.11 | 0.89 ± 0.64 | <0.001 | 0.23 |
| 46 | 1.57 ± 1.53 | <0.001 | 0.18 | 1.57 ± 1.53 | <0.001 | 0.22 | 1.15 ± 0.51 | <0.001 | 0.13 |
| 47 | 1.97 ± 1.68 | 0.009  | 0.05 | 1.97 ± 1.68 | 0.001  | 0.10 | 1.37 ± 0.88 | <0.001 | 0.34 |
| 48 | 1.86 ± 1.30 | <0.001 | 0.12 | 1.86 ± 1.30 | <0.001 | 0.16 | 1.17 ± 0.98 | <0.001 | 0.21 |
| 49 | 2.26 ± 2.25 | 0.004  | 0.08 | 2.26 ± 2.25 | <0.001 | 0.12 | 1.39 ± 0.72 | <0.001 | 0.28 |
| 50 | 1.90 ± 1.31 | <0.001 | 0.18 | 1.90 ± 1.31 | <0.001 | 0.24 | 0.96 ± 1.22 | <0.001 | 0.16 |
| 51 | 2.73 ± 2.24 | 0.001  | 0.11 | 2.73 ± 2.24 | <0.001 | 0.17 | 1.12 ± 0.94 | <0.001 | 0.25 |
| 52 | 2.79 ± 2.44 | <0.001 | 0.15 | 2.79 ± 2.44 | <0.001 | 0.21 | 1.33 ± 1.24 | <0.001 | 0.11 |
| 53 | 2.11 ± 1.93 | 0.030  | 0.03 | 2.11 ± 1.93 | 0.001  | 0.09 | 1.30 ± 1.47 | <0.001 | 0.24 |
| 54 | 2.46 ± 2.68 | 0.001  | 0.09 | 2.46 ± 2.68 | <0.001 | 0.16 | 1.26 ± 0.68 | <0.001 | 0.23 |
| 55 | 1.36 ± 1.26 | <0.001 | 0.15 | 1.36 ± 1.26 | <0.001 | 0.22 | 1.04 ± 0.48 | <0.001 | 0.32 |
| 56 | 1.01 ± 0.99 | <0.001 | 0.21 | 1.01 ± 0.99 | <0.001 | 0.22 | 0.89 ± 1.24 | <0.001 | 0.25 |
| 57 | 2.67 ± 1.76 | 0.004  | 0.08 | 2.67 ± 1.76 | 0.001  | 0.11 | 1.09 ± 0.72 | 0.008  | 0.06 |
| 58 | 1.69 ± 1.20 | 0.001  | 0.11 | 1.69 ± 1.20 | <0.001 | 0.17 | 0.68 ± 0.31 | 0.079  | -    |
| 59 | 1.00 ± 0.88 | 0.003  | 0.08 | 1.00 ± 0.88 | 0.001  | 0.09 | 0.92 ± 1.38 | <0.001 | 0.24 |
| 60 | 3.11 ± 2.80 | 0.001  | 0.12 | 3.11 ± 2.80 | <0.001 | 0.18 | 1.55 ± 1.02 | <0.001 | 0.18 |
| 61 | 1.97 ± 2.31 | 0.001  | 0.09 | 1.97 ± 2.31 | <0.001 | 0.12 | 1.07 ± 0.93 | 0.004  | 0.07 |
| 62 | 1.45 ± 1.19 | <0.001 | 0.21 | 1.45 ± 1.19 | <0.001 | 0.27 | 1.21 ± 0.55 | 0.008  | 0.05 |
| 63 | 1.16 ± 0.99 | 0.007  | 0.07 | 1.16 ± 0.99 | <0.001 | 0.13 | 1.66 ± 1.79 | 0.001  | 0.10 |
| 64 | 1.69 ± 2.53 | <0.001 | 0.21 | 1.69 ± 2.53 | <0.001 | 0.29 | 1.51 ± 1.26 | 0.005  | 0.06 |
| 65 | 1.18 ± 1.60 | 0.001  | 0.10 | 1.18 ± 1.60 | <0.001 | 0.13 | 1.38 ± 1.49 | 0.001  | 0.09 |
| 66 | 1.61 ± 1.69 | <0.001 | 0.21 | 1.61 ± 1.69 | <0.001 | 0.23 | 1.33 ± 2.04 | 0.006  | 0.06 |
| 67 | 1.10 ± 2.41 | 0.002  | 0.09 | 1.10 ± 2.41 | <0.001 | 0.15 | 1.53 ± 1.34 | <0.001 | 0.29 |
| 68 | 1.32 ± 2.16 | <0.001 | 0.21 | 1.32 ± 2.16 | <0.001 | 0.29 | 1.30 ± 1.07 | <0.001 | 0.15 |
| 69 | 1.06 ± 2.05 | 0.052  | -    | 1.06 ± 2.05 | 0.006  | 0.06 | 1.58 ± 1.74 | 0.006  | 0.06 |
| 70 | 1.35 ± 2.02 | 0.087  | -    | 1.35 ± 2.02 | 0.006  | 0.06 | 1.43 ± 1.16 | 0.009  | 0.05 |
| 71 | 1.55 ± 1.92 | 0.001  | 0.10 | 1.55 ± 1.92 | <0.001 | 0.16 | 1.22 ± 0.95 | <0.001 | 0.30 |
| 72 | 0.88 ± 1.83 | 0.001  | 0.10 | 0.88 ± 1.83 | <0.001 | 0.19 | 1.25 ± 1.61 | <0.001 | 0.14 |
| 73 | 1.77 ± 2.68 | <0.001 | 0.14 | 1.77 ± 2.68 | <0.001 | 0.25 | 1.51 ± 1.70 | <0.001 | 0.26 |
| 74 | 1.91 ± 1.32 | <0.001 | 0.19 | 1.91 ± 1.32 | <0.001 | 0.30 | 0.74 ± 0.29 | <0.001 | 0.20 |
| 75 | 1.93 ± 1.80 | 0.160  | -    | 1.93 ± 1.80 | 0.016  | 0.04 | 1.29 ± 1.28 | <0.001 | 0.21 |
| 76 | 1.94 ± 1.98 | 0.004  | 0.08 | 1.94 ± 1.98 | <0.001 | 0.14 | 0.74 ± 0.56 | <0.001 | 0.23 |
| 77 | 2.04 ± 2.80 | 0.083  | -    | 2.04 ± 2.80 | 0.001  | 0.09 | 0.98 ± 0.62 | <0.001 | 0.29 |
| 78 | 1.58 ± 2.20 | 0.004  | 0.07 | 1.58 ± 2.20 | <0.001 | 0.17 | 0.78 ± 0.74 | <0.001 | 0.21 |
| 79 | 1.96 ± 1.88 | 0.001  | 0.11 | 1.96 ± 1.88 | <0.001 | 0.21 | 1.34 ± 1.02 | 0.055  | -    |
| 80 | 0.87 ± 0.67 | <0.001 | 0.22 | 0.87 ± 0.67 | <0.001 | 0.28 | 0.62 ± 0.63 | 0.001  | 0.10 |
| 81 | 1.64 ± 1.45 | <0.001 | 0.21 | 1.64 ± 1.45 | <0.001 | 0.28 | 1.53 ± 1.04 | 0.001  | 0.10 |
| 82 | 2.16 ± 2.26 | <0.001 | 0.34 | 2.16 ± 2.26 | <0.001 | 0.37 | 1.68 ± 1.50 | 0.002  | 0.08 |

|    |             |        |      |             |        |      |             |        |      |
|----|-------------|--------|------|-------------|--------|------|-------------|--------|------|
| 83 | 0.21 ± 1.19 | <0.001 | 0.14 | 0.21 ± 1.19 | <0.001 | 0.24 | 1.24 ± 1.61 | <0.001 | 0.20 |
| 84 | 0.35 ± 1.06 | <0.001 | 0.16 | 0.35 ± 1.06 | <0.001 | 0.21 | 1.39 ± 1.28 | <0.001 | 0.26 |
| 85 | 1.78 ± 3.90 | <0.001 | 0.22 | 1.78 ± 3.90 | <0.001 | 0.29 | 0.57 ± 1.14 | <0.001 | 0.15 |
| 86 | 2.53 ± 3.36 | <0.001 | 0.31 | 2.53 ± 3.36 | <0.001 | 0.34 | 0.90 ± 0.77 | <0.001 | 0.12 |
| 87 | 3.61 ± 2.64 | 0.001  | 0.11 | 3.61 ± 2.64 | <0.001 | 0.17 | 1.71 ± 2.11 | <0.001 | 0.17 |
| 88 | 3.31 ± 2.84 | 0.001  | 0.11 | 3.31 ± 2.84 | <0.001 | 0.14 | 1.19 ± 0.93 | <0.001 | 0.32 |
| 89 | 2.86 ± 2.56 | <0.001 | 0.17 | 2.86 ± 2.56 | <0.001 | 0.23 | 1.54 ± 1.87 | <0.001 | 0.25 |
| 90 | 2.66 ± 2.58 | <0.001 | 0.22 | 2.66 ± 2.58 | <0.001 | 0.28 | 1.78 ± 1.46 | <0.001 | 0.19 |

*P* value adjusted by FDR. ‘-’ denotes the brain regions that are not significantly disrupted across the group

**Table S9. Topological features of healthy controls and patient cohorts**

| Topological features       | Group      | Mean $\pm$ SD   | 95% CI      | <i>P</i><br>(vs. Validation) | <i>P</i><br>(vs. Control) |
|----------------------------|------------|-----------------|-------------|------------------------------|---------------------------|
| Clustering coefficient     | Discovery  | 0.47 $\pm$ 0.03 | 0.43 - 0.52 | 1.000                        | <0.001                    |
|                            | Validation | 0.47 $\pm$ 0.03 | 0.41 - 0.52 | -                            | <0.001                    |
|                            | Control    | 0.52 $\pm$ 0.02 | 0.48 - 0.55 | -                            | -                         |
| Characteristic path length | Discovery  | 3.22 $\pm$ 0.20 | 2.93 - 3.57 | 1.000                        | <0.001                    |
|                            | Validation | 3.18 $\pm$ 0.24 | 2.88 - 3.73 | -                            | <0.001                    |
|                            | Control    | 2.86 $\pm$ 0.04 | 2.80 - 2.93 | -                            | -                         |

*P* value adjusted by FDR



**Table S10. Pearson correlations between topological features and tumour volume**

|                                | Discovery        |                 | Validation       |                 |
|--------------------------------|------------------|-----------------|------------------|-----------------|
|                                | <b>Pearson r</b> | <b><i>P</i></b> | <b>Pearson r</b> | <b><i>P</i></b> |
| Clustering coefficient         | -0.45            | <0.001          | -0.49            | 0.002           |
| Characteristic path length     | 0.43             | <0.001          | 0.58             | <0.001          |
| <i>P</i> value adjusted by FDR |                  |                 |                  |                 |

**Table S11. Multivariate survival statistics of the Discovery cohort**

| Feature                           | OSN  |           |                | PFSN |           |                |
|-----------------------------------|------|-----------|----------------|------|-----------|----------------|
|                                   | HR   | 95%CI     | <i>P</i> value | HR   | 95%CI     | <i>P</i> value |
| Age                               | 1.03 | 0.66-1.59 | 0.907          | 1.18 | 0.73-1.91 | 0.507          |
| Performance <sup>a</sup>          | 1.19 | 0.77-1.84 | 0.432          | 1.21 | 0.72-2.02 | 0.474          |
| EOR <sup>b</sup>                  | 1.68 | 1.07-2.64 | 0.024          | 1.97 | 1.19-3.27 | 0.008          |
| Adjuvant treatment <sup>c</sup>   | 0.24 | 0.14-0.41 | <0.001         | 0.27 | 0.13-0.55 | <0.001         |
| Tumour volume                     | 1.01 | 1.00-1.02 | 0.102          | 1.00 | 0.99-1.01 | 0.352          |
| <b>Indirect connections</b>       | 1.32 | 1.07-1.61 | <b>0.009</b>   | 1.17 | 0.95-1.44 | 0.146          |
| Age                               | 0.96 | 0.62-1.48 | 0.845          | 0.99 | 0.61-1.61 | 0.976          |
| Performance <sup>a</sup>          | 1.18 | 0.77-1.81 | 0.447          | 1.27 | 0.76-2.14 | 0.365          |
| EOR <sup>b</sup>                  | 1.96 | 1.26-3.03 | 0.003          | 2.25 | 1.35-3.74 | 0.002          |
| Adjuvant treatment <sup>c</sup>   | 0.23 | 0.13-0.39 | <0.001         | 0.23 | 0.11-0.47 | <0.001         |
| Tumour volume                     | 1.01 | 1.00-1.02 | 0.262          | 1.00 | 0.99-1.01 | 0.940          |
| <b>Distant regions</b>            | 1.43 | 1.04-1.95 | <b>0.027</b>   | 1.58 | 1.11-2.24 | <b>0.011</b>   |
| Age                               | 0.95 | 0.61-1.49 | 0.832          | 1.10 | 0.67-1.79 | 0.709          |
| Performance <sup>a</sup>          | 1.13 | 0.73-1.73 | 0.588          | 1.14 | 0.69-1.88 | 0.620          |
| EOR <sup>b</sup>                  | 1.96 | 1.27-3.01 | 0.002          | 2.09 | 1.27-3.41 | 0.003          |
| Adjuvant treatment <sup>c</sup>   | 0.21 | 0.12-0.37 | <0.001         | 0.26 | 0.12-0.54 | <0.001         |
| Tumour volume                     | 1.01 | 1.00-1.02 | 0.125          | 1.00 | 0.99-1.01 | 0.552          |
| <b>Clustering coefficient</b>     | 0.59 | 0.38-0.91 | <b>0.016</b>   | 0.53 | 0.32-0.88 | <b>0.013</b>   |
| Age                               | 1.03 | 0.67-1.59 | 0.885          | 1.16 | 0.72-1.87 | 0.550          |
| Performance <sup>a</sup>          | 1.09 | 0.71-1.68 | 0.685          | 1.08 | 0.65-1.80 | 0.766          |
| EOR <sup>b</sup>                  | 1.85 | 1.20-2.85 | 0.006          | 1.97 | 1.19-3.25 | 0.008          |
| Adjuvant treatment <sup>c</sup>   | 0.21 | 0.12-0.37 | <0.001         | 0.24 | 0.11-0.49 | <0.001         |
| Tumour volume                     | 1.01 | 1.00-1.02 | 0.132          | 1.00 | 0.99-1.01 | 0.594          |
| <b>Characteristic path length</b> | 1.59 | 1.04-2.43 | <b>0.031</b>   | 1.58 | 0.97-2.57 | 0.067          |

(a). KPS Performance > 70 as the reference; (b). Complete resection as the reference; (c) Non-CCRT as the reference. *P* value adjusted. **EOR**: extent of resection, **KPS**: Karnofsky Performance Score; **CCRT**: temozolomide concurrent chemoradiotherapy. **Bold *P* values** are still significant after adjusted by FDR

**Table S12. Univariate survival statistics of the Validation cohort**

| Feature                         | OS   |           |                  | PFS  |           |                |
|---------------------------------|------|-----------|------------------|------|-----------|----------------|
|                                 | HR   | 95%CI     | <i>P</i> value   | HR   | 95%CI     | <i>P</i> value |
| <b>Clinical variables</b>       |      |           |                  |      |           |                |
| Age                             | 1.05 | 1.01-1.09 | 0.018            | 1.05 | 1.00-1.10 | 0.016          |
| Sex <sup>a</sup>                | 0.99 | 0.47-2.09 | 0.973            | 1.55 | 0.68-3.50 | 0.294          |
| Performance <sup>b</sup>        | 1.58 | 0.78-3.22 | 0.205            | 0.82 | 0.39-1.71 | 0.595          |
| IDH <sup>c</sup>                | 0.63 | 0.09-4.67 | 0.652            | 0.36 | 0.05-2.75 | 0.327          |
| MGMT <sup>d</sup>               | 0.61 | 0.30-1.24 | 0.178            | 0.44 | 0.20-0.95 | <b>0.036</b>   |
| EOR <sup>e</sup>                | 8.69 | 3.42-22.1 | <b>&lt;0.001</b> | 3.35 | 1.06-10.5 | <b>0.039</b>   |
| Adjuvant treatment <sup>f</sup> | 0.15 | 0.07-0.36 | <b>&lt;0.001</b> | 0.28 | 0.11-0.73 | <b>0.010</b>   |
| Tumour volume                   | 1.00 | 1.00-1.00 | 0.790            | 1.00 | 1.00-1.00 | 0.545          |
| Eloquent location <sup>g</sup>  | 0.65 | 0.23-1.85 | 0.416            | 0.71 | 0.28-1.80 | 0.467          |
| Deep white matter <sup>h</sup>  | 0.42 | 0.19-0.94 | <b>0.036</b>     | 1.85 | 0.80-4.30 | 0.150          |
| Non-enhancing volume            | 1.33 | 0.90-1.96 | 0.159            | 1.30 | 0.87-1.96 | 0.198          |
| <b>Disruption indices</b>       |      |           |                  |      |           |                |
| Direct connection               | 1.10 | 0.78-1.57 | 0.577            | 1.09 | 0.74-1.61 | 0.659          |
| Indirect connection             | 1.22 | 0.44-3.41 | 0.702            | 3.62 | 1.25-10.5 | <b>0.018</b>   |
| CE region                       | 1.02 | 0.83-1.26 | 0.833            | 1.01 | 0.78-1.30 | 0.954          |
| NE region                       | 1.01 | 0.82-1.25 | 0.896            | 0.99 | 0.77-1.28 | 0.969          |
| Distant region                  | 3.36 | 1.50-7.53 | <b>0.003</b>     | 2.03 | 1.10-3.77 | <b>0.025</b>   |
| Indirect region                 | 0.92 | 0.70-1.24 | 0.614            | 0.94 | 0.72-1.24 | 0.667          |
| <b>Topological features</b>     |      |           |                  |      |           |                |
| Clustering coefficient          | 0.43 | 0.21-0.88 | <b>0.021</b>     | 0.28 | 0.10-0.75 | <b>0.012</b>   |
| Characteristic path length      | 3.61 | 1.21-10.8 | <b>0.021</b>     | 5.75 | 1.49-22.2 | <b>0.011</b>   |

(a). Female as the reference; (b). KPS Performance > 70 as the reference; (c). IDH wildtype as the reference; (d) Unmethylated MGMT as the reference; (e). Complete resection as the reference; (f) Non-CCRT as the reference. (g). Non-eloquent location as reference. (h) Deep white matter tracts affected as reference. EOR: extent of resection. KPS: Karnofsky Performance Score; CCRT: temozolomide concurrent chemoradiotherapy. *P* value adjusted by FDR

**Table S13. Multivariate survival statistics of the Validation cohort**

| Feature                           | OS   |           |                | PFS  |           |                |
|-----------------------------------|------|-----------|----------------|------|-----------|----------------|
|                                   | HR   | 95%CI     | <i>P</i> value | HR   | 95%CI     | <i>P</i> value |
| Age                               | 1.81 | 0.82-4.03 | 0.143          | 2.62 | 1.12-6.13 | 0.026          |
| Performance <sup>a</sup>          | 1.82 | 0.72-4.62 | 0.205          | 4.00 | 1.46-11.0 | 0.007          |
| EOR <sup>b</sup>                  | 10.0 | 3.21-31.4 | <0.001         | 7.01 | 1.75-28.1 | 0.006          |
| Adjuvant treatment <sup>c</sup>   | 0.15 | 0.05-0.44 | 0.001          | 0.16 | 0.04-0.61 | 0.007          |
| Tumour volume                     | 1.00 | 0.98-1.02 | 0.922          | 1.01 | 0.99-1.03 | 0.326          |
| <b>Indirect connections</b>       | 1.30 | 0.90-1.87 | 0.163          | 2.20 | 1.39-3.47 | <b>0.001</b>   |
| Age                               | 2.05 | 0.94-4.49 | 0.072          | 3.01 | 1.28-7.12 | 0.012          |
| Performance <sup>a</sup>          | 1.86 | 0.77-4.52 | 0.169          | 3.26 | 1.21-8.83 | 0.020          |
| EOR <sup>b</sup>                  | 14.0 | 4.36-45.2 | <0.001         | 5.31 | 1.39-20.4 | 0.015          |
| Adjuvant treatment <sup>c</sup>   | 0.26 | 0.09-0.79 | 0.017          | 0.42 | 0.09-1.83 | 0.246          |
| Tumour volume                     | 0.99 | 0.98-1.01 | 0.478          | 1.00 | 0.98-1.02 | 0.934          |
| <b>Distant regions</b>            | 3.36 | 1.30-8.67 | <b>0.012</b>   | 2.47 | 1.08-5.66 | <b>0.033</b>   |
| Age                               | 2.31 | 1.03-5.18 | 0.043          | 2.88 | 1.19-6.97 | 0.019          |
| Performance <sup>a</sup>          | 1.75 | 0.71-4.32 | 0.221          | 2.41 | 0.94-6.13 | 0.066          |
| EOR <sup>b</sup>                  | 7.60 | 2.56-22.6 | <0.001         | 2.24 | 0.47-10.7 | 0.311          |
| Adjuvant treatment <sup>c</sup>   | 0.16 | 0.05-0.49 | 0.001          | 0.27 | 0.07-1.05 | 0.059          |
| Tumour volume                     | 0.99 | 0.98-1.01 | 0.351          | 1.00 | 0.98-1.02 | 0.797          |
| <b>Clustering coefficient</b>     | 0.30 | 0.11-0.85 | <b>0.024</b>   | 0.28 | 0.06-1.25 | 0.095          |
| Age                               | 2.08 | 0.93-4.63 | 0.074          | 2.50 | 1.07-5.88 | 0.035          |
| Performance <sup>a</sup>          | 1.94 | 0.76-4.96 | 0.168          | 2.72 | 1.04-7.14 | 0.042          |
| EOR <sup>b</sup>                  | 9.88 | 3.30-29.6 | <0.001         | 3.22 | 0.78-13.3 | 0.106          |
| Adjuvant treatment <sup>c</sup>   | 0.16 | 0.05-0.49 | 0.001          | 0.21 | 0.05-0.87 | 0.031          |
| Tumour volume                     | 1.00 | 0.99-1.02 | 0.819          | 1.01 | 0.99-1.03 | 0.384          |
| <b>Characteristic path length</b> | 6.16 | 1.61-23.5 | <b>0.008</b>   | 7.89 | 1.40-44.5 | <b>0.019</b>   |

(a). KPS Performance = 0 as the reference; (b). Complete resection as the reference; (c) Non-CCRT as the reference. *P* value adjusted. **EOR**: extent of resection, **KPS**: Karnofsky Performance Score; **CCRT**: temozolomide concurrent chemoradiotherapy. **Bold *P* values** are still significant after adjusted by FDR
